# Supplementary material for: m6A Reader Igf2bp1 Regulates the Inflammatory Responses of Microglia by Stabilizing Gbp11 and Cp mRNAs
Source: PubMed Central journal article supplement (PMC9100696; doi:10.3389/fimmu.2022.872252), 2022-04-29

igf2bp1+marker

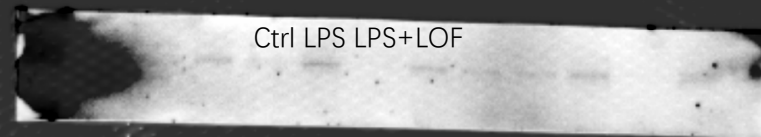

Actin+marker

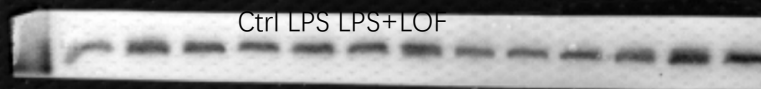

Supplement: DataSheet_1.pdf [file DataSheet_1.pdf]
